# Supplementary material
Source: publisher site journal article supplement (https://www.dovepress.com/article/546455)
Supplement: Supplementary file 1 [file Supplementary%20data_2.docx]

Supplementary **Figure S1**


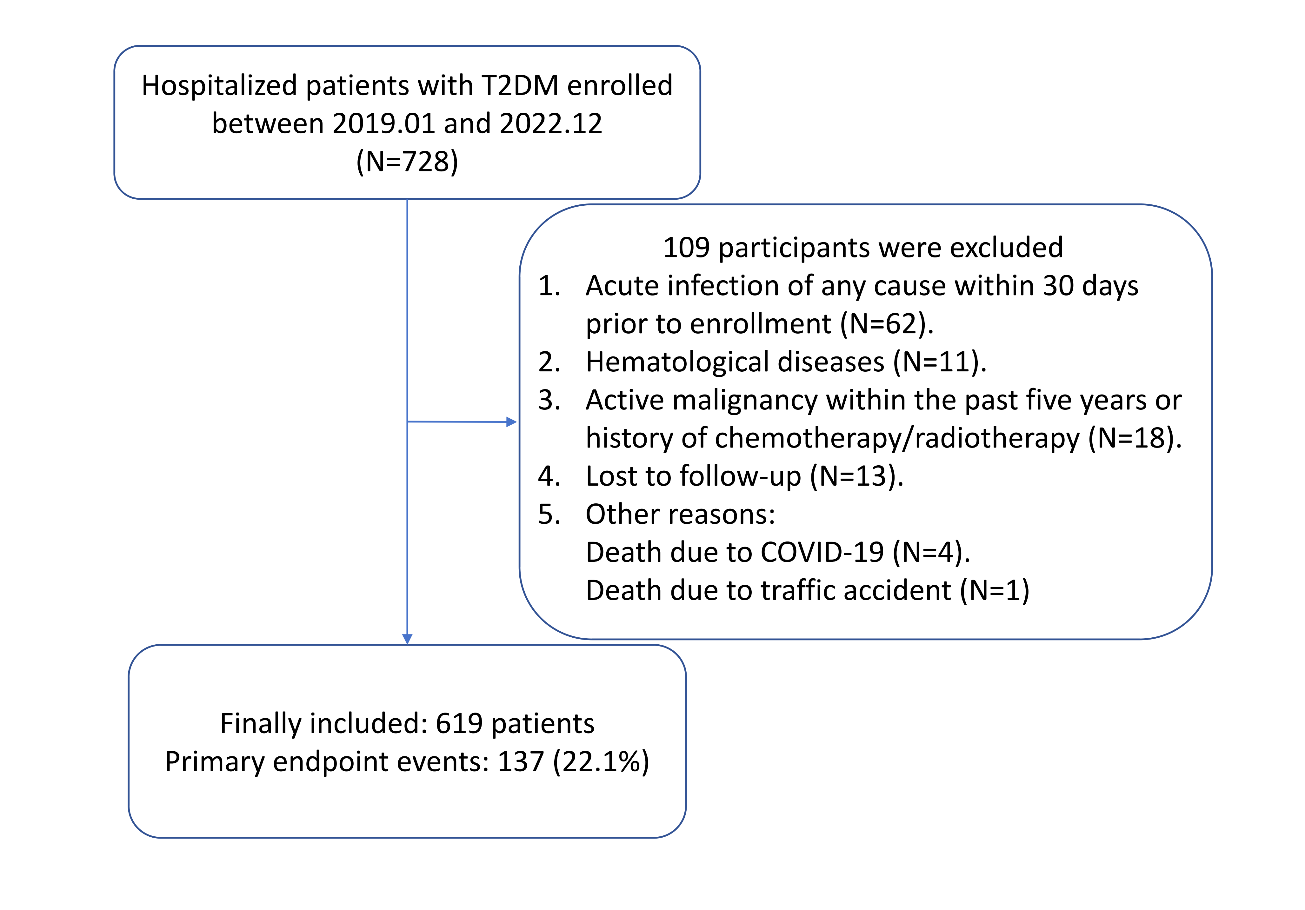


Flowchart of Study Participant Selection. A total of 728 patients were initially identified between January 2019 and December 2022. After excluding 109 participants based on the criteria, the final study cohort consisted of 619 patients. The primary endpoint (all-cause mortality) occurred in 137 patients (22.1%).

Supplementary **Table S1**

| Variable Name | VIF |
| --- | --- |
| Year | 1.35666014160835 |
| DR | 1.07531443532319 |
| Hypertension | 1.11123803399985 |
| CAD | 1.10976294343003 |
| Stroke | 1.14148012904095 |
| SGLT2i | 1.03831060963222 |
| RBC | 7.55666145402571 |
| HGB | 8.87487613083270 |
| HCT | 5.34668176578957 |
| BUN | 2.85780540885913 |
| Scr | 3.23610504117647 |

**Note**: Variance Inflation Factor (VIF) values of covariates included in the fully adjusted Cox regression model (Model 3). VIF < 10 indicates no significant multicollinearity among variables.

Supplementary **Table S2**

| Variables | P-value | | |
| --- | --- | --- | --- |
| Q1 | Q2 | Q3 |
| SIRI |  |  |  |
| Q2 | 0.138 |  |  |
| Q3 | 0.004 | 0.186 |  |
| Q4 | ＜0.001 | 0.030 | 0.186 |
| NLR |  |  |  |
| Q2 | 0.223 |  |  |
| Q3 | 0.033 | 0.264 |  |
| Q4 | ＜0.001 | 0.021 | 0.168 |
| nMLR |  |  |  |
| Q2 | 0.267 |  |  |
| Q3 | 0.068 | 0.267 |  |
| Q4 | ＜0.001 | 0.004 | 0.102 |

**Note**: Hommel-adjusted log-rank test results for pairwise comparisons of Kaplan-Meier survival curves across quartile groups (Q1-Q4) of inflammatory indicators. Significant survival differences (p < 0.05) are denoted between specified quartiles.

Supplementary **Table S3**

|  | AUC | CI-Lower | CI-Upper | Cut-off | Specificity | Sensitivity | Accuracy | NPV | PPV |
| --- | --- | --- | --- | --- | --- | --- | --- | --- | --- |
| NLR | 0.618 | 0.558 | 0.679 | 4.44 | 0.708 | 0.500 | 0.675 | 0.883 | 0.244 |
| nMLR | 0.622 | 0.562 | 0.683 | 3.56 | 0.681 | 0.531 | 0.657 | 0.885 | 0.239 |
| SIRI | 0.632 | 0.573 | 0.692 | 1.82 | 0.572 | 0.684 | 0.590 | 0.906 | 0.231 |

**Note**: ROC analysis of baseline SIRI, NLR, and nMLR for predicting all-cause mortality. Optimal cut-off values were determined by maximizing Youden's index (J). AUC = area under the curve; NPV = negative predictive value; PPV = positive predictive value.
